# Supplementary material for: Advancements in organic fluorescent materials: unveiling the potential of peripheral group modification in dithienyl-diketopyrrolopyrrole derivatives for one- and two-photon bioimaging
Source: Royal Society of Chemistry journal article supplement (doi:10.1039/d4tb02291b), 2024-11-28
Supplement: d4tb02291b1.pdf [file d4tb02291b1.pdf]

**Advancements in Organic Fluorescent Materials: Unveiling the Potential of  
Peripheral Group Modification in dithienyl-diketopyrrolopyrrole derivatives for  
One- and Two-Photon Bioimaging**

Leandro H. Zucolotto Cocca<sup>a\*</sup>, João V. P. Valverde<sup>b</sup>, Celisnolia M. Leite<sup>c</sup>, Natália S. Moreno<sup>c</sup>, Alfredo L. Neto<sup>d</sup>, Andreia G. Macedo<sup>d,e</sup>, Sebastião Pratavieira<sup>b</sup>, Daniel L. Silva<sup>f</sup>, Paula C. Rodrigues<sup>d,e</sup>, Valtencir Zucolotto<sup>c</sup>, Cleber R. Mendonça<sup>b</sup> and Leonardo De Boni<sup>b</sup>

<sup>a</sup> Photonics Group, Institute of Physics, Federal University of Goiás, Goiânia, 74690-900, GO, Brazil.

<sup>b</sup> Sao Carlos Physics Institute, University of São Paulo, CP 369, 13560-970 São Carlos, SP, Brazil

<sup>c</sup> Nanomedicine and Nanotoxicology Group, Sao Carlos Physics Institute, University of São Paulo, 13560-970 São Carlos, SP, Brazil.

<sup>d</sup> Graduate Program in Chemistry, Federal University of Technology – Parana (UTFPR), CP 81531-990 Curitiba, Brazil

<sup>e</sup> Graduate Program in Physics and Astronomy, Federal University of Technology – Paraná (UTFPR), CP 81531-990 Curitiba, Brazil

<sup>f</sup> Department of Natural Sciences, Mathematics and Education, Federal University of São Carlos, Rod. Anhanguera – Km 174, 13600-970 Araras, SP, Brazil

\*Author to whom correspondence should be addressed: leandro.zucolottococca@gmail.com

## Support information

### 1. Time-resolved fluorescence technique

The fluorescence lifetime of the dyes was obtained using the time-domain fluorescence technique. The samples were excited with a  $190\text{ fs}$  laser pulse at  $515\text{ nm}$  (2nd harmonic of the  $1030\text{ nm}$ ) operating with a repetition rate of  $300\text{ Hz}$ , delivered by a laser system (Light Conversion, model Pharos-PH1). The fluorescence signal was collected perpendicularly to the excitation beam by a multimode optical fiber. The optical fiber directs the fluorescence signal to a silicon photodetector with a temporal resolution of approximately  $700\text{ ps}$ . The electronic signal generated by the photodetector is acquired by a  $1\text{ GHz}$  oscilloscope<sup>1</sup>. The signal convolution method was used to obtain an accurate representation of the dyes lifetime, where a theoretical function is convoluted with the temporal instrument response function (IRF)<sup>1,2</sup>. **Figure SI1** shows the experimental curves of fluorescence intensity as a function of time for both compounds.

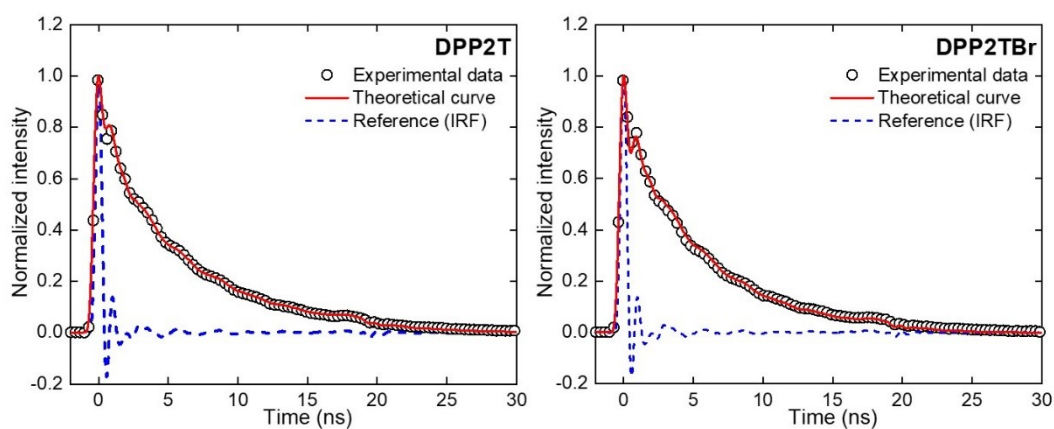

**Figure SI1** - Dithienyl-diketopyrrolopyrrole derivatives fluorescence emission lifetimes, deconvoluted fluorescence signal, and instrument response function.

### 2. Quantum chemical calculations details

**Table SI1** – Optimized structures of dithienyl-diketopyrrolopyrrole derivatives obtained through PCM-B3LYP calculations in chloroform medium. Basis set: *6-311G(d,p)* for H, C, N and O atoms; *cc-pVDZ* for S and Br atoms.

|   | DPP2T     |          |          |   | DPP2TBr   |          |          |
|---|-----------|----------|----------|---|-----------|----------|----------|
| N | -1.640341 | 1.004437 | 0.732580 | N | -1.639660 | 1.017670 | 0.739790 |
| C | -0.646879 | 2.038698 | 0.773240 | C | -0.639630 | 2.045510 | 0.768750 |

|   |           |           |           |    |           |           |           |
|---|-----------|-----------|-----------|----|-----------|-----------|-----------|
| C | 0.525295  | 1.424230  | 0.195192  | C  | 0.526510  | 1.419000  | 0.191100  |
| C | 0.194962  | 0.089911  | -0.162585 | C  | 0.187720  | 0.085100  | -0.155340 |
| C | -1.136010 | -0.163686 | 0.166163  | C  | -1.143980 | -0.157130 | 0.180530  |
| N | 2.360414  | 0.509908  | -0.700547 | N  | 2.353770  | 0.486520  | -0.704430 |
| C | 1.856152  | 1.677974  | -0.133973 | C  | 1.858150  | 1.661280  | -0.145060 |
| C | 1.367014  | -0.524421 | -0.741030 | C  | 1.353760  | -0.541360 | -0.733260 |
| O | -0.881171 | 3.150172  | 1.227229  | O  | -0.863130 | 3.162210  | 1.214650  |
| O | 1.601268  | -1.635863 | -1.195119 | O  | 1.577210  | -1.658030 | -1.179270 |
| C | 3.702284  | 0.206216  | -1.192721 | C  | 3.694160  | 0.170760  | -1.194380 |
| C | 4.659134  | -0.293987 | -0.102764 | C  | 4.649890  | -0.323230 | -0.100620 |
| C | 6.046828  | -0.624953 | -0.661878 | C  | 6.035950  | -0.664480 | -0.657860 |
| C | 7.015227  | -1.159755 | 0.399112  | C  | 7.002610  | -1.193580 | 0.407610  |
| C | 8.405189  | -1.495525 | -0.153194 | C  | 8.390820  | -1.539660 | -0.142750 |
| C | 9.366107  | -2.030010 | 0.912571  | C  | 9.350080  | -2.068390 | 0.927320  |
| C | -2.982267 | 1.308191  | 1.224563  | C  | -2.980080 | 1.333600  | 1.229600  |
| C | -3.939018 | 1.808450  | 0.134568  | C  | -3.935530 | 1.827820  | 0.135720  |
| C | -5.326825 | 2.139096  | 0.693554  | C  | -5.321580 | 2.169460  | 0.692760  |
| C | -6.295053 | 2.674282  | -0.367409 | C  | -6.287990 | 2.698700  | -0.372880 |
| C | -7.685172 | 3.009640  | 0.184738  | C  | -7.676110 | 3.045330  | 0.177320  |
| C | -8.645923 | 3.544469  | -0.881007 | C  | -8.635150 | 3.574130  | -0.892930 |
| C | 2.563668  | 2.918248  | 0.066131  | C  | 2.570760  | 2.898850  | 0.042580  |
| C | 2.011357  | 4.059501  | 0.625419  | C  | 2.027480  | 4.045940  | 0.598090  |
| C | 2.913553  | 5.144083  | 0.714214  | C  | 2.925370  | 5.134040  | 0.678350  |
| C | 4.157889  | 4.850175  | 0.228349  | C  | 4.161940  | 4.825360  | 0.184320  |
| S | 4.253760  | 3.222857  | -0.354499 | S  | 4.262410  | 3.189300  | -0.395150 |
| C | -1.843580 | -1.403904 | -0.034056 | Br | 5.664020  | 5.963000  | 0.087360  |
| C | -1.291187 | -2.545291 | -0.592968 | C  | -1.856640 | -1.394640 | -0.007260 |
| C | -2.193530 | -3.629733 | -0.682069 | C  | -1.313340 | -2.541880 | -0.562420 |
| C | -3.438041 | -3.335572 | -0.196813 | C  | -2.211390 | -3.629850 | -0.642920 |
| S | -3.533897 | -1.708174 | 0.385858  | C  | -3.448110 | -3.320900 | -0.149470 |
| H | 3.563943  | -0.580786 | -1.936452 | S  | -3.548540 | -1.684770 | 0.429840  |
| H | 4.104681  | 1.076531  | -1.713340 | Br | -4.950410 | -4.458300 | -0.053010 |
| H | 4.219720  | -1.187122 | 0.353048  | H  | 3.551110  | -0.622230 | -1.930770 |
| H | 4.748079  | 0.457569  | 0.688600  | H  | 4.100070  | 1.033030  | -1.726440 |
| H | 6.477938  | 0.272402  | -1.124504 | H  | 4.207240  | -1.210480 | 0.363400  |
| H | 5.946597  | -1.365390 | -1.465598 | H  | 4.742550  | 0.434160  | 0.684900  |
| H | 6.584112  | -2.056512 | 0.862000  | H  | 6.470580  | 0.226840  | -1.128660 |
| H | 7.115274  | -0.420375 | 1.204111  | H  | 5.932060  | -1.411660 | -1.454780 |
| H | 8.835547  | -0.599251 | -0.616355 | H  | 6.568190  | -2.084450 | 0.878700  |
| H | 8.304419  | -2.234265 | -0.957453 | H  | 7.106220  | -0.447260 | 1.205650  |

|   |           |           |           |   |           |           |           |
|---|-----------|-----------|-----------|---|-----------|-----------|-----------|
| H | 9.514458  | -1.299212 | 1.713756  | H | 8.824330  | -0.649160 | -0.613870 |
| H | 10.346863 | -2.259706 | 0.487293  | H | 8.286590  | -2.285130 | -0.940330 |
| H | 8.979565  | -2.946304 | 1.369531  | H | 9.501920  | -1.330960 | 1.721680  |
| H | -3.384735 | 0.437866  | 1.745130  | H | 10.329550 | -2.305650 | 0.503400  |
| H | -2.843985 | 2.095163  | 1.968341  | H | 8.960300  | -2.979090 | 1.392630  |
| H | -4.027756 | 1.057010  | -0.656936 | H | -3.386210 | 0.471300  | 1.761440  |
| H | -3.499680 | 2.701716  | -0.321058 | H | -2.837020 | 2.126470  | 1.966100  |
| H | -5.226821 | 2.879202  | 1.497610  | H | -4.028280 | 1.070430  | -0.649800 |
| H | -5.757968 | 1.241515  | 1.155711  | H | -3.492600 | 2.714950  | -0.328260 |
| H | -6.394831 | 1.935260  | -1.172770 | H | -5.217610 | 2.916670  | 1.489630  |
| H | -5.863925 | 3.571298  | -0.829781 | H | -5.756490 | 1.278280  | 1.163570  |
| H | -7.584671 | 3.748044  | 0.989340  | H | -6.391780 | 1.952280  | -1.170800 |
| H | -8.115525 | 2.113115  | 0.647418  | H | -5.853230 | 3.589340  | -0.844080 |
| H | -8.259385 | 4.461001  | -1.337494 | H | -7.571700 | 3.790950  | 0.974730  |
| H | -9.626798 | 3.773873  | -0.455846 | H | -8.109940 | 2.155090  | 0.648620  |
| H | -8.794015 | 2.813992  | -1.682532 | H | -8.245060 | 4.484610  | -1.358410 |
| H | 0.981028  | 4.093456  | 0.958271  | H | -9.614580 | 3.811780  | -0.469120 |
| H | 2.648899  | 6.109089  | 1.125365  | H | -8.787160 | 2.836570  | -1.687140 |
| H | 5.028979  | 5.484932  | 0.173201  | H | 0.999040  | 4.086300  | 0.937860  |
| H | -0.260732 | -2.579455 | -0.925410 | H | 2.670530  | 6.102880  | 1.083790  |
| H | -1.928836 | -4.594828 | -1.092991 | H | -0.284780 | -2.582430 | -0.901820 |
| H | -4.309249 | -3.970191 | -0.141951 | H | -1.956500 | -4.598790 | -1.048110 |

65

66 Using the compounds optimized structures (see **Table SI1**), QQC's concerning the  
67 one-photon absorption (1PA) and two-photon absorption (2PA) processes were  
68 performed. **Tables SI2** and **SI3** summarize the results obtained, including transition  
69 energy, oscillator strength, 2PA probability, and 2PA cross-section ( $\sigma^{2PA}$ ).

70 The computed 1PA spectrum of the compounds in molar absorptivity was  
71 obtained using the oscillator strength and transition energy values, as provided in **Table**  
72 **SI2**, and utilizing the equation described in<sup>3</sup>. It is important to note that the line widths  
73 used were estimated from the decomposition of the experimental 1PA spectrum into three  
74 absorption bands and its fitting using Gaussian curves (the average FWHM linewidth  
75 values for the three bands are: 0.4 eV, 0.4 eV, and 0.3 eV), and that although 20 transitions  
76 were computed using the TD-DFT method, only those within the experimental spectral  
77 range were used to computed the 1PA spectrum<sup>3,4</sup>.

78 As described in the manuscript, the two highest-energy electronic bands observed  
79 in the 1PA spectrum are ascribed to some electronic transitions. For greater accuracy, it

was observed that for the **DPP2T** molecule, the second band is related with three electronic transitions, labeled as 4, 5, and 7 (see **Table SI2**). On the other hand, the third band is ascribed to a single transition, labeled as 10. Conversely, for the **DPP2TBr** molecule, the second band comprises two electronic transitions (4 and 5), and the third band comprises 4 transitions (9, 10, 12, and 14). However, transitions 10 and 14 have a negligible contribution, given the low values of their oscillator strength, and TD-DFT calculations are likely overestimating these values, a typical behavior of DFT theory<sup>5</sup>.

To obtain a computed 2PA spectrum in terms of  $\sigma^{2PA}$ , the properties summarized in **Table SI3** were utilized, along with the equation described in<sup>4</sup>. The spectrum was obtained considering only the second electronic excited-state (electronic transition 2, see **Table SI3**), while states 3 and 6 were not included as they lie in a spectral region where the resonant enhancement effect due to 1PA occurs.

**Table SI2** – Theoretical one-photon absorption properties of dithienyl-diketopyrrolopyrrole samples obtained by TD-PCM-B3LYP calculations in chloroform medium. Basis set: 6-311++G(d,p) for H, C, N and O atoms; aug-cc-pVDZ for S and Br atoms.

| States number | DPP2T         |                 |          | DPP2TBr       |                 |          |
|---------------|---------------|-----------------|----------|---------------|-----------------|----------|
|               | <i>E</i> (eV) | Wavelength (nm) | <i>f</i> | <i>E</i> (eV) | Wavelength (nm) | <i>f</i> |
| 1             | 2.264         | 548             | 0.5080   | 2.177         | 570             | 0.6270   |
| 2             | 3.139         | 395             | 0.0000   | 3.096         | 400             | 0.0000   |
| 3             | 3.409         | 364             | 0.0000   | 3.266         | 380             | 0.0000   |
| 4             | 3.663         | 338             | 0.0490   | 3.522         | 352             | 0.3490   |
| 5             | 3.739         | 332             | 0.2540   | 3.632         | 341             | 0.0160   |
| 6             | 3.896         | 318             | 0.0000   | 3.680         | 337             | 0.0000   |
| 7             | 3.942         | 315             | 0.0310   | 3.977         | 312             | 0.0000   |
| 8             | 3.993         | 310             | 0.0000   | 4.004         | 310             | 0.0000   |
| 9             | 4.024         | 308             | 0.0000   | 4.034         | 307             | 0.0210   |
| 10            | 4.377         | 283             | 0.2430   | 4.038         | 307             | 0.0050   |
| 11            | 4.526         | 274             | 0.0000   | 4.040         | 307             | 0.0000   |
| 12            | 4.656         | 266             | 0.0000   | 4.204         | 295             | 0.2390   |
| 13            | 4.796         | 259             | 0.0000   | 4.529         | 274             | 0.0000   |
| 14            | 4.862         | 255             | 0.0000   | 4.535         | 273             | 0.0010   |
| 15            | 4.906         | 253             | 0.0190   | 4.651         | 267             | 0.0000   |
| 16            | 4.915         | 252             | 0.0870   | 4.749         | 261             | 0.0000   |
| 17            | 4.997         | 248             | 0.0000   | 4.776         | 260             | 0.0800   |
| 18            | 5.037         | 246             | 0.0000   | 4.913         | 252             | 0.0540   |
| 19            | 5.114         | 242             | 0.0210   | 4.915         | 252             | 0.0090   |
| 20            | 5.171         | 240             | 0.0000   | 4.942         | 251             | 0.0010   |

97 **Table SI3** – Theoretical two-photon absorption properties of dithienyl-diketopyrrolopyrrole samples  
 98 obtained by QRF-PCM-B3LYP calculations in chloroform medium. Basis set: *6-311++G(d,p)* for H, C, N  
 99 and O atoms; *aug-cc-pVDZ* for S and Br atoms.

| DPP2T            |               |                                |                                 |                      |                             |
|------------------|---------------|--------------------------------|---------------------------------|----------------------|-----------------------------|
| States<br>number | $E_{2P}$ (eV) | Two-photons<br>Wavelength (nm) | 2PA prob. ( $\times 10^3$ a.u.) | $\Gamma_{FWHM}$ (eV) | $\sigma_{theor}^{2PA}$ (GM) |
| 1                | 4.520         | 1097                           | 0.00                            | ---                  | ---                         |
| 2                | 6.280         | 790                            | 8.61                            | 0.50                 | 12.4                        |
| 3                | 6.820         | 727                            | 127.00                          | ---                  | ---                         |
| 4                | 7.320         | 677                            | 0.00                            | ---                  | ---                         |
| 5                | 7.480         | 663                            | 0.00                            | ---                  | ---                         |
| 6                | 7.800         | 636                            | 50.10                           | ---                  | ---                         |
| DPP2TBr          |               |                                |                                 |                      |                             |
| States<br>number | $E_{2P}$ (eV) | Two-photons<br>Wavelength (nm) | 2PA prob. ( $\times 10^3$ a.u.) | $\Gamma_{FWHM}$ (eV) | $\sigma_{theor}^{2PA}$ (GM) |
| 1                | 4.360         | 1137                           | 0.0                             | ---                  | ---                         |
| 2                | 6.200         | 800                            | 25.8                            | 0.50                 | 36.4                        |
| 3                | 6.540         | 758                            | 250.0                           | ---                  | ---                         |
| 4                | 7.040         | 704                            | 0.0                             | ---                  | ---                         |
| 5                | 7.260         | 683                            | 0.0                             | ---                  | ---                         |
| 6                | 7.360         | 674                            | 119.0                           | ---                  | ---                         |

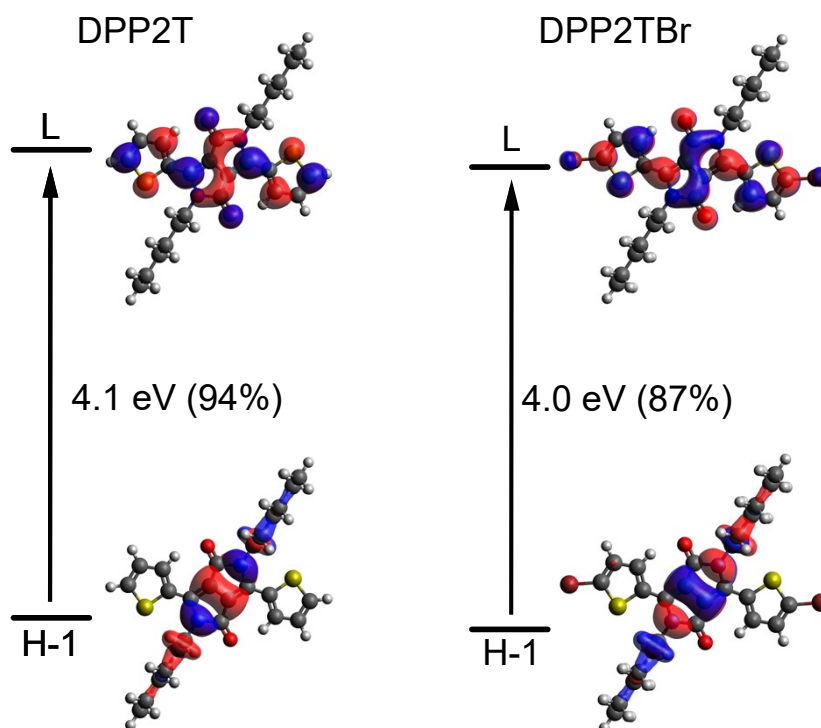

**Figure SI2** – Representation of the MOs (H: HOMO, L: LUMO) involved in the lowest-energy allowed 2PA transition of dithienyl-diketopyrrolopyrrole derivatives, along with the respective percentage contributions of the excitations. Results obtained from QRF-PCM-B3LYP calculations.

### 3. Two-photon absorption measurements

To determine the two-photon absorption cross-section ( $\sigma^{2PA}$ ) of dithienyl-diketopyrrolopyrrole derivatives in chloroform, solutions with a concentration of *ca.*  $10^{-2} \text{ mol/L}$  were prepared and placed in quartz cells with optical paths of  $2 \text{ mm}$  lengths.

The  $\sigma^{2PA}$  was measured from  $790 \text{ nm}$  to  $1000 \text{ nm}$  by the open-aperture Z-Scan technique using a  $150 - 180 \text{ fs}$  laser-like pulse delivered by a tunable optical parametric amplifier (OPA) (Light Conversion, model ORPHEUS). OPA was pumped by a  $190 \text{ fs}$  pulse from a laser system (Light Conversion, model Pharos-PH1) centered at  $1030 \text{ nm}$  operating at a repetition rate of  $750 \text{ Hz}$ .

The open-aperture Z-Scan technique consists in determining the change in light transmittance when the sample is scanned along the focus of a Gaussian laser pulse (Z-axis)<sup>6</sup>. In this process, the sample is subjected to different excitation intensities according to the Z-position. In order to remove linear effects from the measurement, the transmitted power at a given Z-position is divided by the transmitted power when the sample is far away from the pulse focus, and nonlinear optical effects are not present, thus obtaining

the normalized transmittance (NT)<sup>7</sup>. The nonlinear absorption coefficient ( $\beta$ ) is obtained from the NT curve fit using the equation,

$$T(z) = \frac{1}{\sqrt{\pi}q_0(z,0)} \int_{-\infty}^{\infty} \ln[1 + q_0(z,0)e^{-\tau^2}] d\tau \quad (1)$$

in this

$q_0(z,0) = \beta I_0 L (1 + (z^2/z_0^2))^{-1}$ ,  $L$  is the sample length (2 mm quartz sample cell),  $z_0$  the Rayleigh length,  $z$  the sample position and  $I_0$  is the laser-like pulse intensity at the focus. Finally, the 2PA cross-section is determined from the  $\sigma_{2PA} = (\hbar\omega\beta)/N$ , where  $\hbar\omega$  is the photon energy and  $N$  is the number of molecules per cubic centimeter<sup>7</sup>. The  $\sigma_{2PA}$  is expressed in Goppert-Mayer ( $GM$ ) units, where  $1 GM = 1 \cdot 10^{-50} \cdot cm^4 \cdot s \cdot photon^{-1}$ . **Figure SI3** shows some typical open-aperture Z-scan curves, with the respective adjustment curves.

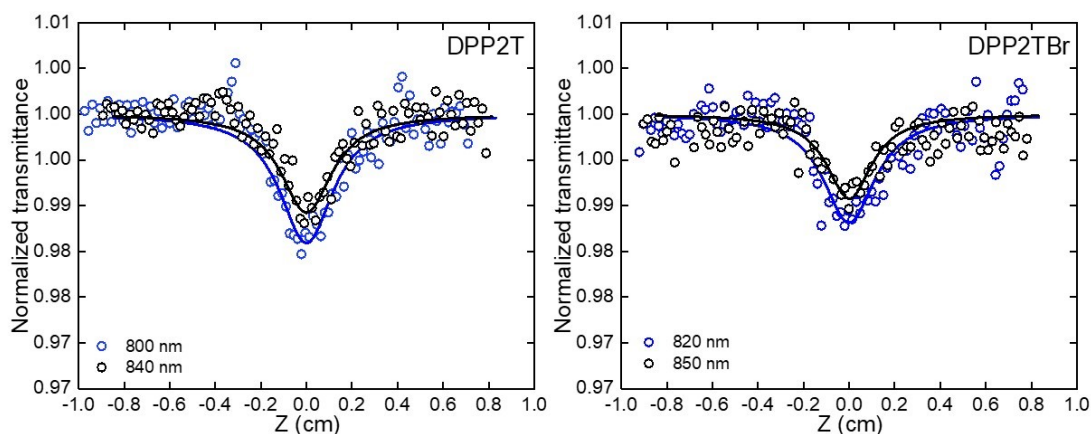

**Figure SI3** – Open-aperture z-scan curves of **DPP2T** and **DPP2TBr** compounds, where circles represent experimental data and lines correspond to curves obtained through fitting.

#### 4. Measurements of fluorescence excited by 2PA

Fluorescence emission induced by two-photon absorption measurements, excited in 850 nm and 900 nm, were performed using the same laser system operated at a repetition rate of 1.5 kHz. The fluorescence signal was collected through an optical fiber connected to a spectrophotometer (Ocean Optics, model HR-2000++). The excitation laser power was controlled by means of a rotating polarizer, which allowed monitoring

of the fluorescence emission induced by 2PA as a function of the laser intensity for different pulse energies. The fluorescence spectra are the results of an average of 5 s of spectrophotometer data acquisition<sup>7-9</sup>.

148

## 149 5. Solvatochromism measurement

150

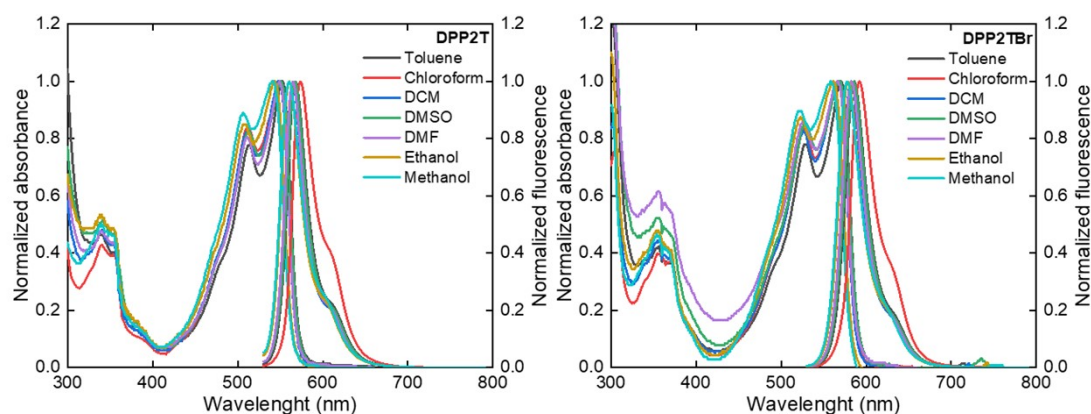

151

152 **Figure SI4** - Spectrum of absorption and fluorescence normalized for the compounds in different solvents.

153

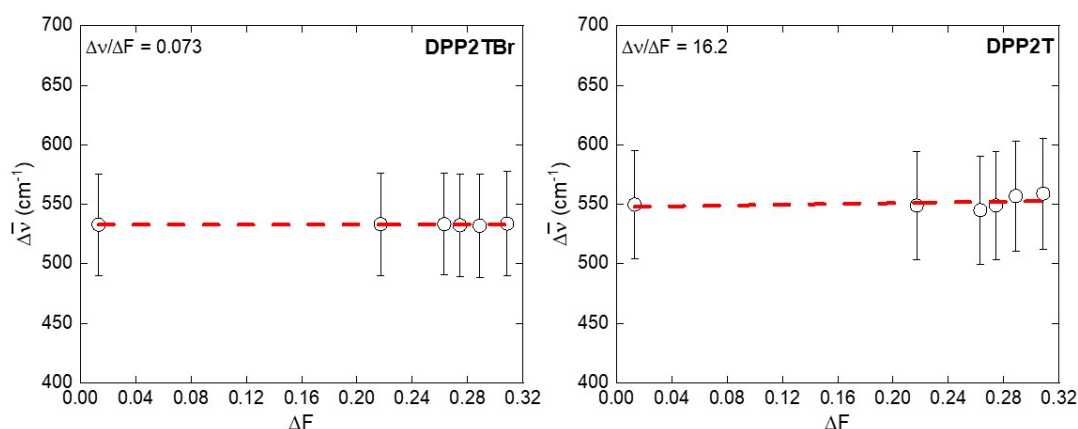

154

155 **Figure SI5** - Stokes shift (black circles) as a function of the Lippert-Mataga polarity functions. The red  
156 dashed lines are the linear fit to determine the slope  $\frac{\Delta\nu}{\Delta F}$ .

157

## 158 6. Transition dipole moment

159

160 **Figure SI6** shows the one-photon absorption spectra of dithienyl-  
161 diketopyrrolopyrrole derivatives, which were decomposed into some Gaussian curves to  
162 determine the transition dipole moment of the electronics bands. The equation used is  
163 described in<sup>3</sup>.

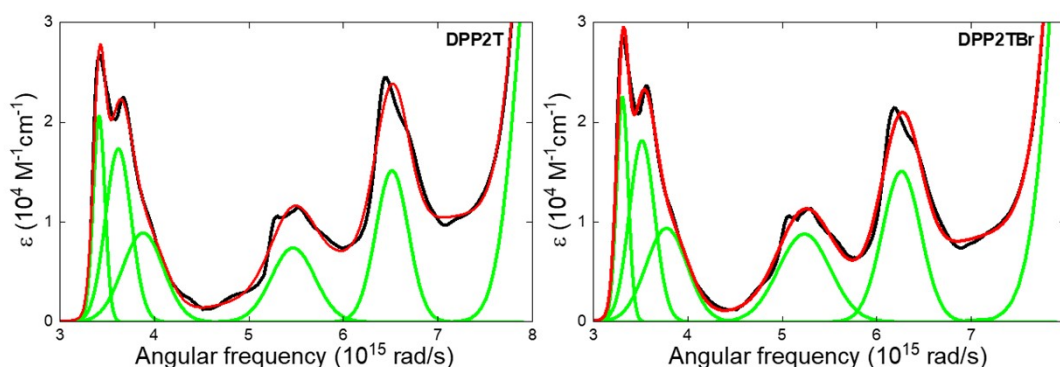

165

166 **Figure S16** – One-photon absorption spectrum of dithienyl-diketopyrrolopyrrole derivatives (black lines)  
 167 decomposed with three Gaussian curves (green lines). The red lines are sum of overlap Gaussian curves.

168

169

## 170 7. Synthesis of the diketopyrrolopyrroles derivatives.

171 The solvents and reagents were purchased from Sigma-Aldrich and used as  
 172 received. The  $^1\text{H}$  and  $^{13}\text{C}$  NMR spectra were recorded using a Bruker Avance III HD  
 173 500 MHz spectrometer at room temperature. The total nitrogen, carbon, hydrogen, and  
 174 sulfur are determined using a CHNS analyzer (Fison Instrument model EA 1108).

175 The DPP2T and DPP2TBr (Scheme 1) were synthesized following the procedure  
 176 reported by Scalon *et al.*<sup>10</sup>, described briefly following:

177

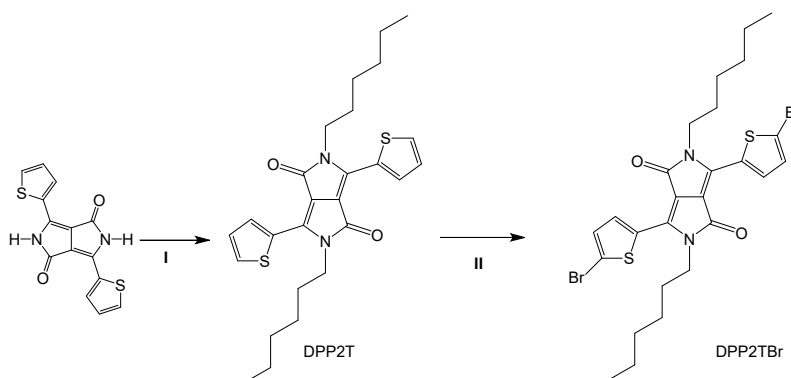

178

179 Scheme S1. Synthetic procedures for the synthesis of DPP derivatives. (I): bromohexane,  
 180  $\text{K}_2\text{CO}_3$ , DMF, 130 °C. (II): NBS,  $\text{CHCl}_3$ , 0 °C.

181

182 **DPP2T**: In a round-bottom flask 3,6-di(thiophen-2-yl)pyrrolo[3,4-c]pyrrole-1,4(2H,5H)-  
 183 dione (1.7 mmol), potassium carbonate (5.8 mmol), and 20 mL of anhydrous  
 184 dimethylformamide were added under argon atmosphere. After a stirring at 90 °C for one  
 185 hour, 1-bromohexane (43 mmol) was added dropwise, and the reaction was stirred at

186 130 °C overnight. In sequence, the solution was cooled down to room temperature,  
187 poured in 22.0 mL of deionized water, and stirred for 1 h. The reaction product was  
188 extracted with chloroform and dried over anhydrous sodium sulphate. After solvent  
189 evaporation, the product was purified using chromatography column (chloroform as  
190 eluent) and recrystallized with methanol.

191  $^1\text{H}$  NMR (500 MHz,  $\text{CDCl}_3$ )  $\delta$ (ppm): 8.92 (d,  $J$  = 3.2 Hz, 2H), 7.64 (d,  $J$  = 4.3 Hz, 2H),  
192 7.28 (dd,  $J$  = 8.7, 4.0 Hz, 2H), 4.09 – 4.05 (m, 4H), 1.78 – 1.71 (m, 4H), 1.41 (dd,  $J$  =  
193 14.5, 7.0 Hz, 4H), 1.32 (dd,  $J$  = 8.8, 5.3 Hz, 8H), 0.88 (t,  $J$  = 6.9 Hz, 6H).

194  $^{13}\text{C}$  NMR (500 MHz,  $\text{CDCl}_3$ )  $\delta$ (ppm): 161.39, 140.03, 135.25, 130.67, 129.79, 128.61,  
195 107.70, 42.23, 31.41, 29.92, 26.54, 22.55, 14.00.

196 Elemental Analysis: Calcd for  $\text{C}_{26}\text{H}_{32}\text{N}_2\text{O}_2\text{S}_2$ : C 66.63; H 6.88; N 5.98; S 13.68. Found:  
197 C 65.64; H 6.16; N 5.88; S 13.69.

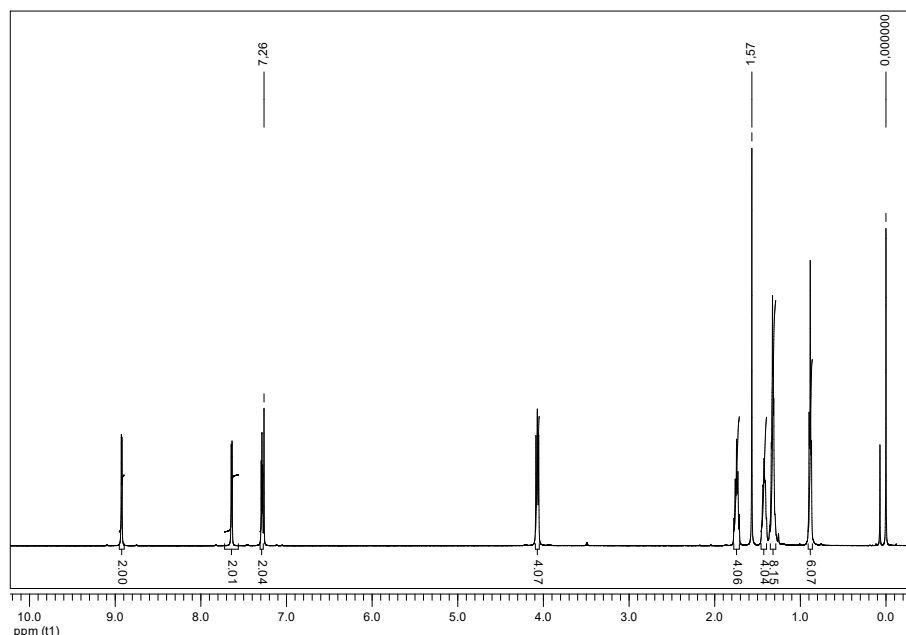

198

199

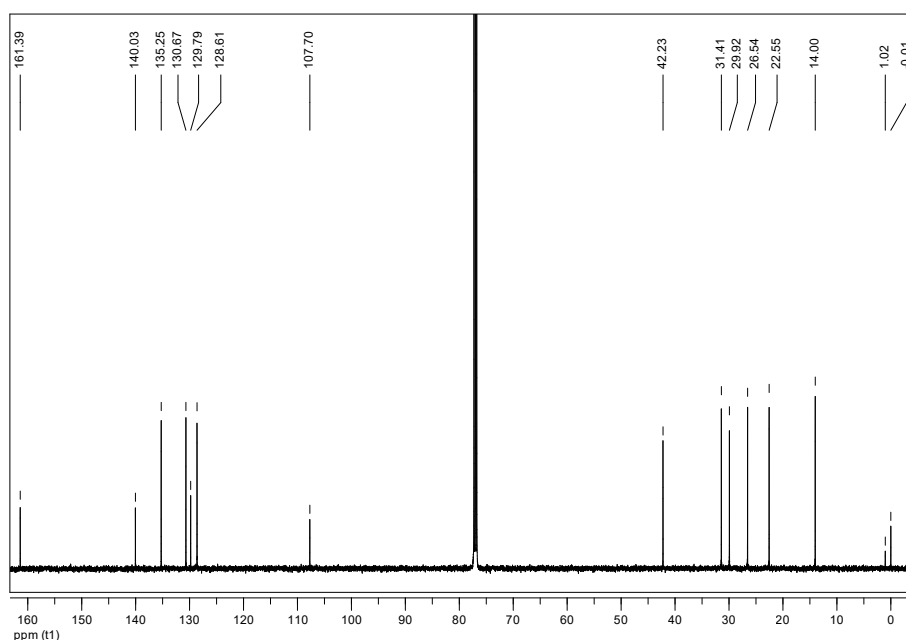

200

201 Figure SI7 -  $^1\text{H}$  and  $^{13}\text{C}$  NMR spectra of the DPP2T.

202

203 **DPP2TBr**: In a round-bottom flask DPP2T (1.3 mmol), *N*-bromosuccinimide (NBS)  
 204 (3.0 mmol), and 30 mL of anhydrous chloroform were added, and the reaction was stirred  
 205 overnight at 0 °C protect from light. The solvent was rotaevaporated and the crude solid  
 206 was recrystallized with methanol.

207  $^1\text{H}$  NMR (500 MHz,  $\text{CDCl}_3$ )  $\delta$  (ppm): 8.68 (d,  $J = 4.2$  Hz, 2H), 7.24 (d,  $J = 4.2$  Hz, 2H),  
 208 4.01 – 3.96 (m, 2H), 1.75 – 1.68 (m, 4H), 1.42 (s, 2H), 1.35 – 1.29 (m, 8H), 0.89 (t,  $J =$   
 209 6.9 Hz, 6H).

210  $^{13}\text{C}$  NMR (500 MHz,  $\text{CDCl}_3$ )  $\delta$  161.06, 139.01, 135.36, 131.66, 131.12, 119.16, 107.82,  
 211 42.29, 31.36, 29.95, 26.51, 22.52, 14.00.

212 Elemental Analysis: Calcd for  $\text{C}_{26}\text{H}_{30}\text{Br}_2\text{N}_2\text{O}_2\text{S}_2$ : C 49.85; H 4.83; N 4.47; S 10.24.  
 213 Found: C 49.78; H 4.92; N 4.43; S 10.20.

214

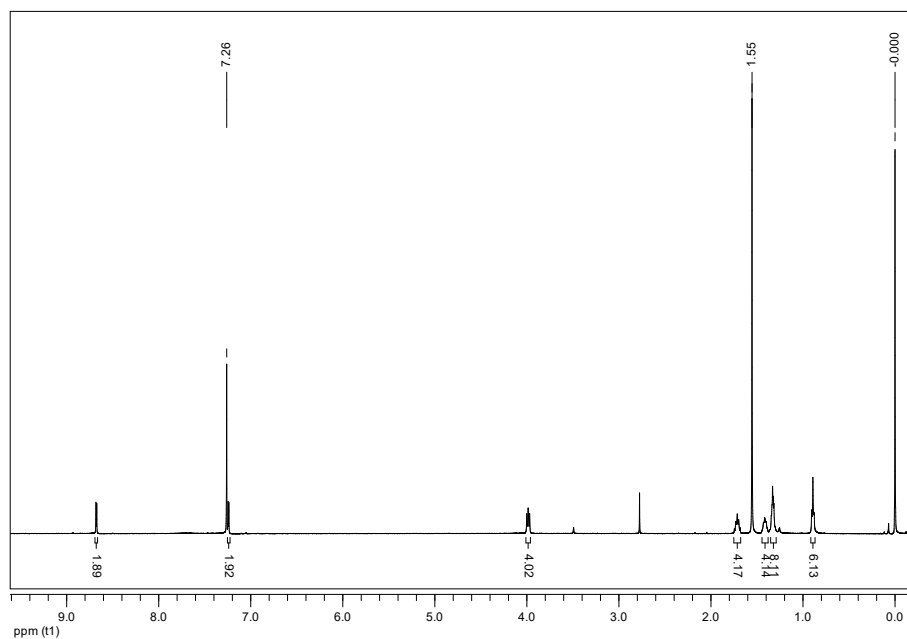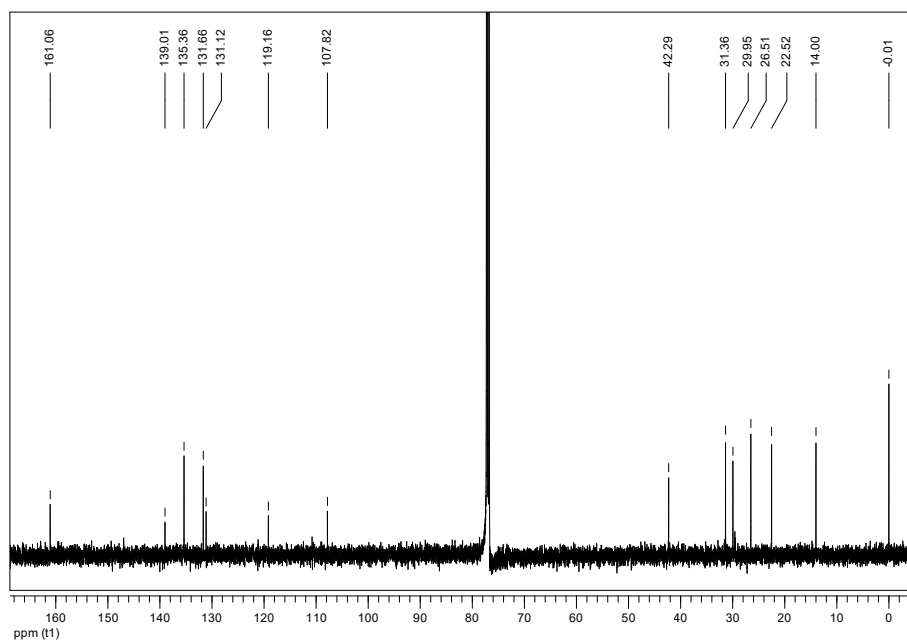

Figure SI8 -  $^1\text{H}$  and  $^{13}\text{C}$  NMR spectra of the DPP2TBr.

## 8. References

- [1] L. Zucolotto Cocca, M. Ayhan, A. Gürek, V. Ahsen, Y. Bretonnière, J. de Paula Siqueira, F. Gotardo, C. Mendonça, C. Hirel, L. De Boni, Mechanism of the Zn(II)Phthalocyanines' Photochemical Reactions Depending on the Number of

- 228 Substituents and Geometry, *Molecules* 21 (2016) 635.  
229 <https://doi.org/10.3390/molecules21050635>.
- 230 [2] C.B. Talbot, J. Lagarto, S. Warren, M.A.A. Neil, P.M.W. French, C. Dunsby,  
231 Correction Approach for Delta Function Convolution Model Fitting of  
232 Fluorescence Decay Data in the Case of a Monoexponential Reference  
233 Fluorophore, *J Fluoresc* 25 (2015) 1169–1182. [https://doi.org/10.1007/s10895-](https://doi.org/10.1007/s10895-015-1583-4)  
234 [015-1583-4](https://doi.org/10.1007/s10895-015-1583-4).
- 235 [3] L.H. Zucolotto Cocca, A.G. Pelosi, J.V.P. Valverde, J. le Bescont, C. Breton-  
236 Patient, S. Piguel, C.R. Mendonça, L. De Boni, 3-arylthioimidazo[1,2-a]pyridine  
237 derivatives: A theoretical and experimental study of its photophysical properties, *J*  
238 *Photochem Photobiol A Chem* (2023) 114675.  
239 <https://doi.org/10.1016/j.jphotochem.2023.114675>.
- 240 [4] J. Dipold, E.E. Romero, J. Donnelly, T.P. Calheiro, H.G. Bonacorso, B.A. Iglesias,  
241 J.P. Siqueira, F.E. Hernandez, L. De Boni, C.R. Mendonca, Two-photon  
242 absorption properties of BODIPY-like compounds based on BF 2 –naphthyridine  
243 complexes, *Physical Chemistry Chemical Physics* 21 (2019) 6662–6671.  
244 <https://doi.org/10.1039/C8CP06580B>.
- 245 [5] H. Nitta, I. Kawata, A close inspection of the charge-transfer excitation by TDDFT  
246 with various functionals: An application of orbital- and density-based analyses,  
247 *Chem Phys* 405 (2012) 93–99. <https://doi.org/10.1016/j.chemphys.2012.06.016>.
- 248 [6] D.S. Corrêa, L. De Boni, L. Misoguti, I. Cohanoschi, F.E. Hernandez, C.R.  
249 Mendonça, Z-scan theoretical analysis for three-, four- and five-photon absorption,  
250 *Opt Commun* 277 (2007) 440–445. <https://doi.org/10.1016/j.optcom.2007.05.043>.
- 251 [7] M.G. Vivas, L. De Boni, C.R. Mendonça, Two-Photon Spectroscopy of Organic  
252 Materials, in: *Molecular and Laser Spectroscopy*, Elsevier, 2018: pp. 165–191.  
253 <https://doi.org/10.1016/B978-0-12-849883-5.00008-5>.
- 254 [8] D.S. Correa, L. De Boni, B. Nowacki, I. Grova, B.D. Fontes, P.C. Rodrigues, J.R.  
255 Tozoni, L. Akcelrud, C.R. Mendonça, Two-photon excitation and optical limiting  
256 in polyfluorene derivatives, *J Polym Sci B Polym Phys* 50 (2012) 148–153.  
257 <https://doi.org/10.1002/polb.22390>.
- 258 [9] L.H. Zucolotto Cocca, L.M.G. Abegão, L.F. Sciuti, R. Vabre, J. de Paula Siqueira,  
259 K. Kamada, C.R. Mendonca, S. Piguel, L. De Boni, Two-Photon Emissive Dyes  
260 Based on Push–Pull Purines Derivatives: Toward the Development of New  
261 Photoluminescence Bioprobes, *The Journal of Physical Chemistry C* 124 (2020)  
262 12617–12627. <https://doi.org/10.1021/acs.jpcc.0c01859>.
- 263
